1 Effects of thermal stress on amount, composition, and antibacterial properties of coral mucus

2

3 Rachel M. Wright<sup>1,2\*</sup>, Marie E. Strader<sup>2,3</sup>, Heather M. Genuise<sup>2</sup>, Mikhail V. Matz<sup>2</sup>

4

5 1. Department of Genetics, Harvard Medical School, 77 Avenue Louis Pasteur, Boston, MA  
6 02115, USA

7 2. Department of Integrative Biology, The University of Texas at Austin, 2415 Speedway  
8 C0990, Austin, TX 78712, USA

9 3. Department of Ecology, Evolution, and Marine Biology, University of California Santa  
10 Barbara, Santa Barbara, CA 93106, USA

11

12 \*Corresponding author: Rachel M. Wright

13 Email: [rachelwright8@gmail.com](mailto:rachelwright8@gmail.com)

14

15

16 **ABSTRACT**

17 The surface mucus layer of reef-building corals supports several essential functions including  
18 feeding, sediment clearing, and protection from pathogenic invaders. For the reef ecosystem,  
19 coral mucus provides energy to support heterotrophic benthic communities. Mucus production  
20 represents a substantial metabolic investment on behalf of the coral: as much as half of the fixed  
21 carbon supplied by the corals' algal symbionts is incorporated into expelled mucus. In this study,  
22 we examined if bleaching (disruption of the coral–algal symbiosis) has the potential to indirectly  
23 disturb reef ecosystem function by impacting the nutritional composition of coral mucus. In a  
24 controlled laboratory thermal stress challenge, visibly paled corals produced mucus with higher  
25 protein and lipid content and increased antibacterial activity relative to healthy corals. These  
26 results are likely explained by the expelled symbionts in the mucus of bleached individuals. This  
27 study illuminates how the immediate effects of coral bleaching could impact the reef-ecosystem  
28 indirectly through modulation of available nutrients within the ecosystem.

## 29 INTRODUCTION

30 Coral bleaching results from the breakdown of the symbiosis between a coral host and its  
31 algal symbiont, *Symbiodinium*. Rising sea surface temperatures have increased the global risk of  
32 coral bleaching to alarming levels (Hughes et al. 2018), highlighting the need to understand the  
33 impacts of bleaching on both coral populations and the ecosystems they support. The direct  
34 impacts of bleaching on the animal host and algal symbiont are well studied. For example, coral  
35 bleaching has been shown to down-regulate genes related to host immunity (Pinzon et al. 2015)  
36 and alter host metabolism (Kenkel, Meyer, and Matz 2013; Rodrigues and Grottoli 2007).  
37 Symbionts expelled during bleaching produce elevated amounts of reactive oxygen species, but  
38 are otherwise physiologically similar to endosymbionts (Nielsen, Petrou, and Gates 2018).  
39 Numerous studies have also examined the indirect effects of coral bleaching and consequent  
40 mortality on community structure and function. For example, mass coral bleaching induces shifts  
41 in reef-fish assemblage structure and alters recruitment success (Richardson et al. 2018; Booth  
42 and Beretta 2002). However, the impact of coral bleaching on the nutrient cycle involving coral  
43 mucus is largely unknown.

44 Coral mucus is a complex mixture of proteins, lipids, and carbohydrates that is produced  
45 by mucocytes in the coral epidermal layer and secreted by coral surface tissues. Up to about half  
46 of the photosynthetically fixed carbon supplied by a coral's algal symbiont is expelled as mucus  
47 (Crossland 1987; Crossland, Barnes, and Borowitzka 1980; Davies 1984). This coral surface  
48 mucus layer acts as a defense against desiccation and pathogens for the coral (reviewed in  
49 (Brown and Bythell 2005), and is also released into the water column where it traps suspended  
50 particles and acts as an energy source for benthic communities (Wild et al. 2004). Given the  
51 integral role of photosynthetically fixed carbon in producing coral mucus, it is predicted that

52 coral bleaching events will reduce mucus production and subsequently impact the flow of energy  
53 throughout the reef ecosystem (Bythell and Wild 2011). However, the extent to which coral  
54 bleaching shifts the nutritional composition and function of coral mucus is yet to be  
55 characterized.

56 In the Florida Keys, annual mass bleaching events are predicted to begin by the mid-  
57 century (Manzello 2015). Currently, multiple anthropogenic factors including thermal stress,  
58 increased storms, and disease outbreaks have led to a near 80% decline in reef cover in the  
59 Florida Keys since the 1980s (Williams and Miller 2011; Williams, Miller, and Kramer 2008;  
60 Porter et al. 2001). In particular, corals in the genus *Acropora* have faced some of the most  
61 dramatic declines in this region. The staghorn coral, *Acropora cervicornis*, has been selected as a  
62 focal species for multiple active restoration programs, such as the Coral Restoration Foundation,  
63 due to its relatively fast asexual growth through fragmentation. As restoration efforts aim to  
64 replenish stands of *A. cervicornis*, it is critical to assess this species' greater role in coral reef  
65 ecosystem. This study aims to characterize how coral mucus changes during acute thermal stress  
66 in *A. cervicornis* and to determine the potential consequences of this change on the coral reef  
67 ecosystem.

68

69

## 70 **MATERIALS & METHODS**

### 71 **Corals**

72 Fifteen *Acropora cervicornis* genets (n = 3 fragments per genet) were shipped from the Coral  
73 Restoration Foundation (Key Largo, Florida USA, Project ID CRF-2016-021) on 7 September  
74 2016 to the University of Texas at Austin. Upon arrival, corals were immediately tagged with  
75 colored zip ties to uniquely identify each genet and allowed to recover for 12 days in artificial  
76 seawater (ASW; 30–31 ppt) at 25°C under 12000K LED lights on a 12h/12h day/night cycle.  
77 Corals were fed weekly with Ultimate Coral Food (Coral Frenzy, LLC).

78

### 79 **Experimental conditions**

80 Coral fragments were partitioned into experimental and control tanks. One genet (U10)  
81 experienced mortality during the recovery period, so only one U10 fragment remained when the  
82 experiment began. For all other genets, one fragment was placed in a control tank (26°C) and one  
83 fragment was placed in an experimental tank. Any remaining fragments from the shipment of n =  
84 3 per genet were retained in a holding tank, though many genets developed tissue loss or  
85 experienced damage on a single fragment during shipping. The single remaining U10 fragment  
86 was placed in the experimental tank. The temperature in the experimental tank was ramped from  
87 26°C to 31°C over 33 hours. High summer temperatures in the Florida Keys often reach 31°C  
88 (Manzello 2015). Therefore, a 31°C heat treatment was chosen to represent an ecologically  
89 relevant stressor.

90 After corals had been exposed to experimental conditions for four days, corals appeared visibly  
91 pale relative to initial photographs and paired control fragments (Figure 1, Figure 3A). At this  
92 time, the temperature in the experimental tank was reduced to 26°C over 6 hours.

93

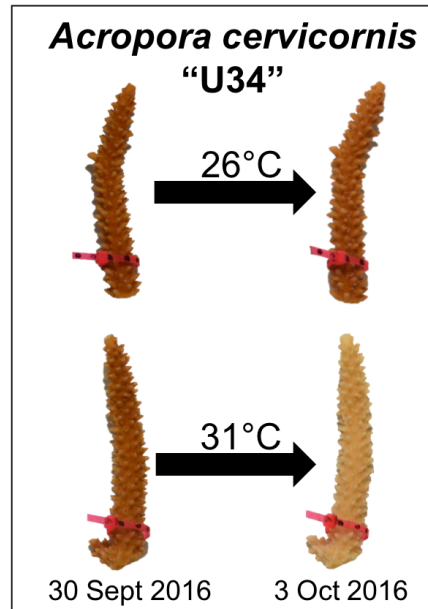

94

95 **Figure 1: Experimental design and representative coral image.** Corals were maintained in  
96 either control (26°C) or experimental (31°C) conditions for four days. Paling was observed for  
97 fragments in the experimental treatment, but not under control conditions.

98

### 99 **Image analysis**

100 Prior to the experiment, photographs of each fragment were taken using a Nikon D5100 camera.  
101 Images of the front and back of each fragment were taken using the same camera, settings, and  
102 lighting each day of the experiment. Brightness values in images were measured for the front and  
103 back sides of each fragment using image analysis software (ImageJ, (Schneider, Rasband, and  
104 Eliceiri 2012). Corals become brighter (paler) as their symbioses with pigmented *Symbiodinium*  
105 break down. Therefore, changes in coral brightness reflect changes in *Symbiodinium* densities  
106 (Winters et al. 2009). A standard curve of brightness values was constructed using standard  
107 Coral Health Charts that were included in each image. Brightness values were standardized to  
108 color cards to normalize for any minor differences in lighting across days.

109 **Mucus collection**

110 After the experiment, each coral fragment was placed within a pre-weighed 50 mL conical tube  
111 containing 5 mL ASW from the respective tank. Tubes were placed on their sides and secured to  
112 a gently rocking incubator plate (135 RPM, 28°C) for 20 minutes, rotating the tubes every 5  
113 minutes to ensure that all sides of the coral fragment were submerged in water. After rocking,  
114 fragments were inverted dry above the liquid in the conical for 20 minutes and lightly  
115 centrifuged (200 RPM) for 2 minutes to pull down mucus adhering to the surface of the coral,  
116 modified from (Wild et al. 2004). The volume and weight of mucus from each fragment was  
117 measured and stored at -80°C. Coral fragments were returned to their tanks. The mucus  
118 collection procedure was repeated six days later, exactly as described above. During mucus  
119 collection, algal cells were clearly visible in some samples. All mucus aliquots were briefly  
120 centrifuged to remove the algal pellet before the experiments described below.

121

122 **Mucus composition**

123 Total protein was measured following the Coomassie (Bradford) Protein Assay Kit (Thermo  
124 Scientific, Waltham, MA, USA). Total carbohydrate was measured using the Total Carbohydrate  
125 Quantification Assay Kit (Abcam, Cambridge, UK). Total lipids were extracted and the dry  
126 weights of each mucus sample were measured. A standard curve was prepared using reagent  
127 grade cholesterol in a 2:1 chloroform:methanol mixture and an aliquot of 2:1  
128 chloroform:methanol was added to each sample tube. After mixing, the solvent was evaporated  
129 from all standard and sample tubes on a heat block at 90°C. Concentrated sulfuric acid was  
130 added to each tube, then incubated at 90°C for 20 minutes. Samples were cooled, then plated in  
131 triplicate into wells of a 96-well plate. Background absorbance was measured at 540 nm. After

132 incubating each sample with 50  $\mu$ L of vanillin-phosphoric acid for 10 minutes, absorbance was  
133 measured again at 540 nm. The concentrations of protein, carbohydrate, and lipid in the mucus,  
134 estimated using standard curves, were normalized to the volume of mucus expelled and the  
135 surface area of the fragment.

136

### 137 **Antibacterial activity**

138 Cultures of laboratory *E. coli* (K-12) were grown overnight in LB, then washed twice in sterile  
139 ASW to remove remaining culture media. Coral mucus (140  $\mu$ L) and washed *E. coli* culture (60  
140  $\mu$ L) was added to triplicate wells in 96-well plates. The covered plates were incubated at 37°C  
141 for 12 hours. Every 30 minutes the plate was shaken and the absorbance at 600 nm was  
142 measured.

143

### 144 **Coral surface area**

145 Fragment surface area was estimated using a 3D scanner and accompanying ScanStudioPro  
146 software (NextEngine, Santa Monica, CA, USA). Each scan was completed using a 360 degree  
147 scan with 16 divisions and 10,000 points/inch<sup>2</sup>. Scans were then trimmed, polished to fill holes,  
148 fused and then surface area was estimated based on a size standard.

149

### 150 **Real-time quantitative PCR**

151 The forward primer 5'-TCTGTACGCCAACACTGTGCTT-3' and reverse primer 5'-  
152 AGTGATGCCAAGATGGAGCCT-3' was used to amplify the *Acropora cervicornis* actin  
153 sequence as developed in (Winter 2017). The forward primer 5'-  
154 GTGAATTGCAGAACTCCGTG-3' and reverse primer 5'-CCTCCGCTTACTTATATGCTT-3'



155 was used to amplify the *Symbiodinium* ITS2 sequence. Primer pair specificity was verified by gel  
156 electrophoresis and melt curve analysis of the amplification product obtained with *A. cervicornis*  
157 holobiont DNA. Primer efficiencies were determined by amplifying a series of four-fold  
158 dilutions of *A. cervicornis* holobiont DNA and analyzing the results using *PrimEff* function in  
159 the *MCMC.qpcr* package (Matz, Wright, and Scott 2013) in R. Briefly,  $C_T$  (threshold cycle)  
160 results were plotted as  $C_T$  vs.  $\log_2[\text{DNA}]$ , and amplification efficiencies (amplification factor per  
161 cycle) of each primer pair were derived from the slope of the regression using formula:  
162  $\text{efficiency} = 2^{-1/\text{slope}}$  (Pfaffl 2001).

163 Mucus aliquots were centrifuged to remove any cell debris. A 14  $\mu\text{L}$  aliquot of coral mucus was  
164 combined with SYBR Green PCR Master Mix (Applied Biosystems), 1.5  $\mu\text{M}$  forward and  
165 reverse primers, and water. The Roche LightCycler 480 system was used to carry out the PCR  
166 protocol (95°C for 40 seconds, then 40 cycles of 60°C for 1 minute and 72°C for 1 minute) and  
167 detect the fluorescence signal.

168

## 169 **Statistics**

170 All statistical analyses were performed in R (3.4.0, (R Core Team 2017)). The *MCMCglmm*  
171 package (Hadfield 2010) was used to explain variation in coral color and mucus composition,  
172 with treatment as a fixed effect and genotype as a random effect. The *nlme* package (Pinheiro et  
173 al. 2017) was used for time-series analysis of antibacterial activity, with time, treatment, and  
174 their interaction as fixed effects and plate well as a random effect. Experimental data and R  
175 scripts are included as Supplemental Data S1 and S2, respectively. Data and scripts can also be  
176 accessed on GitHub: [https://github.com/rachelwright8/bleached\\_coral\\_mucus](https://github.com/rachelwright8/bleached_coral_mucus).

177

178 **RESULTS**

179 **Coral bleaching and mucus collection**

180 After four days in the experimental treatment at 31°C, corals paled significantly compared to  
181 corals in the control condition ( $\beta = -1.16$ ,  $p < 0.001$ , Figure 3A). Corals from both treatments  
182 produced similar amounts of mucus by volume ( $\beta = 0.01$ ,  $p = 0.25$ , Figure 2A) and weight ( $\beta =$   
183  $0.14$ ,  $p = 0.27$ , Figure 2B). After a six-day recovery period, corals in both treatments produced  
184 significantly less mucus by volume ( $\beta = -0.14$ ,  $p < 0.001$ , Figure 2A) and weight ( $\beta = -1.1$ ,  $p <$   
185  $0.001$ , Figure 2B) compared to the first time point.

186

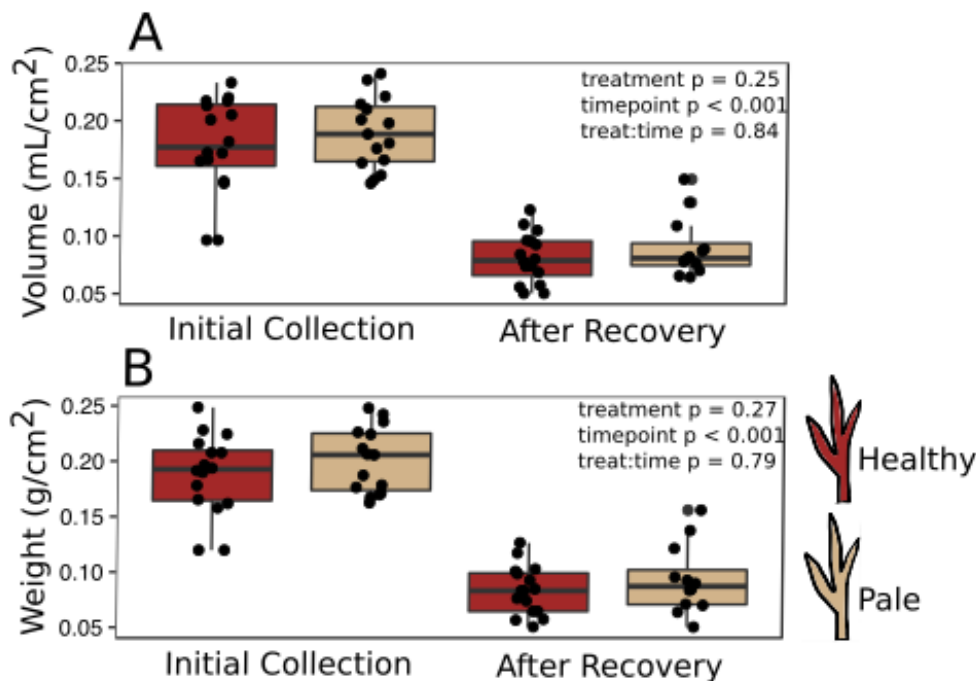

187

188 **Figure 2: Mucus production.** Mucus was collected immediately after paling was observed  
189 (“Initial”) and six days after the challenged corals were returned to control conditions  
190 (“Recovery”). The volume (A) and weight (B) of the recovered mucus was normalized to the  
191 surface area of the coral fragment.

192 **Mucus biochemistry**

193 Although heat-stressed corals were visibly pale, the mucus produced by these fragments  
194 contained significantly more total protein ( $\beta = 2.1$ ,  $p < 0.001$ , Figure 3B) and total lipid ( $\beta =$   
195  $15.7$ ,  $p = 0.02$ , Figure 3C). There was also a marginally significant increase in carbohydrate  
196 content in mucus from pale corals ( $\beta = 0.64$ ,  $p = 0.10$ , Figure 3D).

197

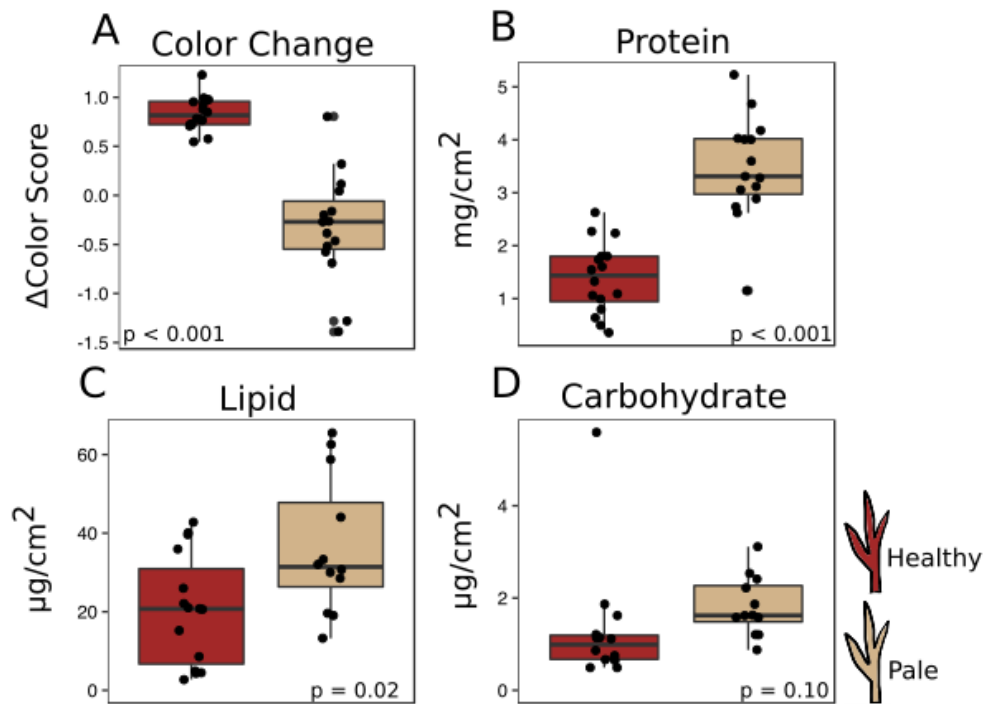

198

199 **Figure 3: Effects of heat stress.** Dark red boxes represent fragments in control conditions, beige  
200 boxes represent heat-stressed fragments. **A:** Effect on coral color (decrease in color score  
201 indicates bleaching). **(B–D):** Effects on mucus composition: protein **(B)**, in mg/cm<sup>2</sup> fragment  
202 surface area, and lipid **(C)** and carbohydrate **(D)**, in µg/cm<sup>2</sup> fragment surface area.

203

204

205 **Mucus antibacterial activity**

206 Antibacterial activity increased in thermally stressed corals from the experimental treatment  
207 relative to healthy corals (ANOVA  $p = 0.0067$ , Figure 4). Absorbance at 600 nm, which reflects  
208 bacterial density, decreased throughout the incubation period in all mucus samples. However,  
209 bacterial density declined significantly faster in mucus samples from heat-stressed corals.

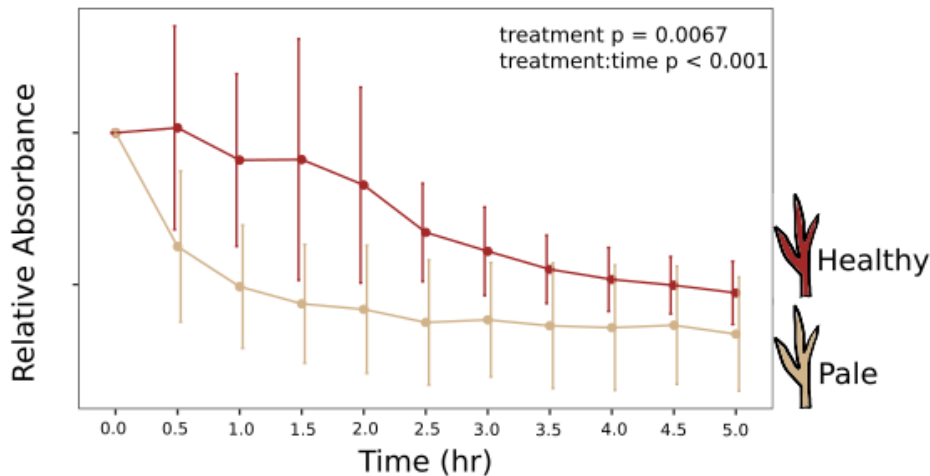

210

211 **Figure 4: Antibacterial activity of coral mucus.** Absorbance at 600 nm reflects the density of  
212 inoculated bacteria in coral mucus samples.

213

214 **Presence of host and symbiont DNA in mucus**

215 Real-time quantitative PCR (qPCR) was performed to determine the relative abundances of  
216 coral- and *Symbiodinium*-derived DNA sequences present in the mucus released by healthy and  
217 heat-stressed corals. Primers were designed to target a coral-specific actin gene and the  
218 *Symbiodinium* ITS2 region. Presumably, copies of the coral-specific actin gene would represent  
219 lysed coral cells, while copies of the ITS2 region would represent material released from  
220 *Symbiodinium* cells in the mucus.

221 Few coral-specific actin copies were detected and no ITS2 sequences were present in the mucus  
222 of unchallenged, healthy corals (Figure 5). However, mucus released by heat-stressed, pale coral  
223 fragments contained abundant copies of both coral- and symbiont-derived sequences (Figure 5).  
224

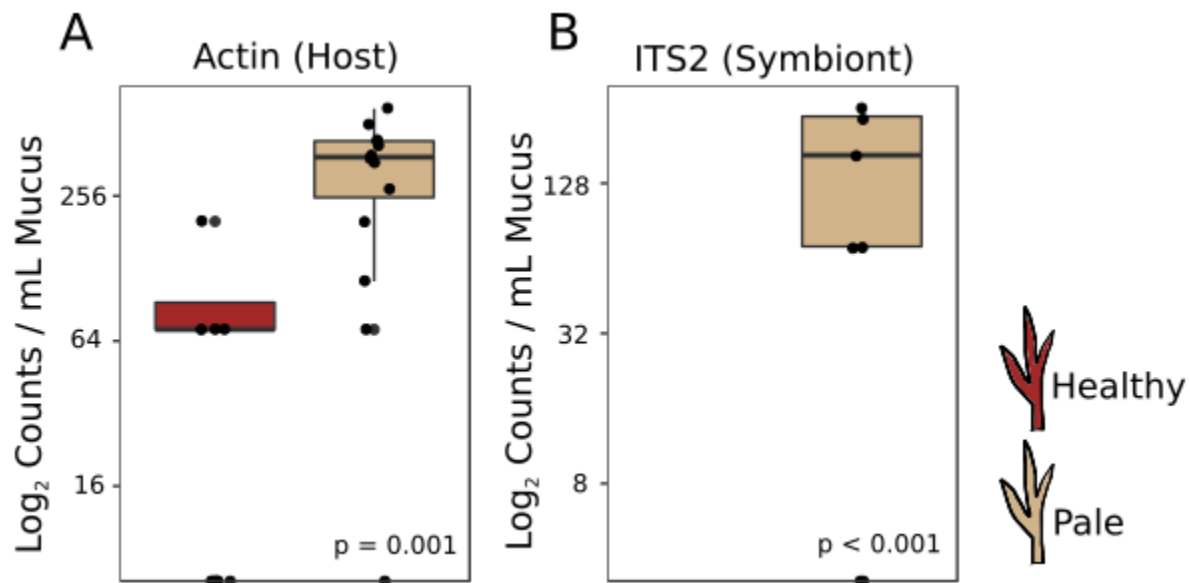

225  
226 **Figure 5: *Symbiodinium* and coral DNA in mucus.** Real-time quantitative PCR detected copies  
227 of *A. cervicornis* actin (A) or *Symbiodinium* ITS2 (B) in the coral mucus of healthy and pale  
228 corals.

229

230

231 **DISCUSSION**

232 **Coral mucus stores take a long time to replenish.**

233 Mucus volumes released during the initial collection ( $0.18 \pm 0.04$  mL/cm<sup>2</sup>, or about 1.8 L/m<sup>2</sup>) are  
234 consistent with daily mucus release values previously reported for submerged acroporids (1.7  
235 L/m<sup>2</sup> in Wild et al. 2004). However, following a six-day recovery period, less than half of the  
236 original mucus volume was collected ( $46.8 \pm 13.2\%$ ,  $p < 0.001$ , Figure 2A), suggesting that mucus  
237 stores were not completely replenished in this amount of time. The methods used in this study to  
238 extract mucus left the coral nubbins completely dry. Therefore, the results presented here  
239 represent the total mucus attached to a coral at any one time rather than the amount of mucus  
240 may be naturally released into the water column daily. These results emphasize the importance  
241 of measuring mucus release over time to confidently estimate daily release rates and predict daily  
242 energetic flow throughout the reef ecosystem.

243

244 **Stressed corals produce mucus high in protein and lipid.**

245 Given the energetic cost of producing mucus (Riegl and Branch 1995), it is reasonable to predict  
246 that corals with low densities of autotrophic symbionts would produce less, or lower nutritional  
247 quality, mucus than healthy corals. We found no difference in the quantity of mucus produced by  
248 stressed corals compared to healthy corals after four days of heat stress or after a six-day  
249 recovery period (Figure 2), suggesting that the quantity of mucus produced a coral is relatively  
250 unaffected by thermal stress and that mucus stores cannot be replenished within a week.  
251 Surprisingly, we found higher protein and lipid content in mucus from pale corals relative to  
252 mucus produced by healthy corals (Figure 3). *Symbiodinium* store reserve energy as lipid  
253 droplets and starch granules that are translocated from the algal membrane to coral cells in a

254 healthy coral–algae symbiotic relationship (Patton and Burris 1983). We observed a pellet of  
255 *Symbiodinium* cells in the mucus of thermally stressed corals, but not in mucus produced by  
256 healthy corals. Though *Symbiodinium* cells were pelleted and removed from all mucus  
257 collections, extracellular lipid droplets would remain in the mucus and represent a potential  
258 explanation for the increased abundance of lipids in mucus from stressed corals. Likewise,  
259 proteins and lipids released from damaged *Symbiodinium* and host cells would also be present in  
260 the mucus of stressed corals. This particular possibility is supported by finding of both coral and  
261 *Symbiodinium* DNA in the mucus of stressed corals (Figure 5). Future studies should measure  
262 long-term effects of bleaching to determine the duration of this observed enrichment in coral  
263 mucus quality following thermal stress.

264

#### 265 **Stressed corals produce mucus with high antibacterial activity.**

266 Surprisingly, this study found that mucus collected from stressed coral fragments eliminated  
267 bacteria faster than mucus from healthy fragments from matched genotypes (Figure 4).  
268 Antibacterial activity of coral mucus is attributed to antimicrobial substances produced by  
269 commensal microbes living on the coral surface (Nissimov, Rosenberg, and Munn 2009; Shnit-  
270 Orland and Kushmaro 2009). In contrast to our results, a previous study found reduced  
271 antibacterial activity in mucus collected from *A. palmata* during a summer bleaching event in the  
272 Florida Keys (Ritchie 2006). The discrepancy in findings could be attributed to the timing of  
273 collections. Mucus in this study was collected as soon as corals became pale, whereas the 2005  
274 study collected mucus after corals in the Florida Keys had been experiencing high levels of  
275 thermal stress and bleaching for about a month (Eakin et al. 2010). Long-term thermal stress is  
276 known to promote coral disease by altering bacterial pathogenicity and host susceptibility (Bruno

277 et al. 2007; Maynard et al. 2015). In our short-term bleaching conditions, the increased protein  
278 and lipid content in the mucus (Figure 3B–C) may have temporarily improved the antibacterial  
279 activity of commensal microbes that exist in the coral mucus. Another possibility is that the  
280 expelled *Symbiodinium* themselves released some antimicrobial products. Though the  
281 mechanism is unclear, *Symbiodinium* do appear to play a role in a coral’s ability to manage  
282 immune stress and regulate microbial communities (Littman, Bourne, and Willis 2010; Rouzé et  
283 al. 2016; Wright et al. 2017).

284

## 285 **CONCLUSIONS**

286 Our results show that thermal stress does not significantly affect the volume of mucus produced  
287 by *A. cervicornis* immediately following a bleaching event. Surprisingly, stressed corals  
288 produced mucus with higher protein content, higher lipid content, and increased antibacterial  
289 activity relative to unstressed controls. Additional lipids and proteins likely come from  
290 *Symbiodinium* and host cells damaged during bleaching rather than from additional investment  
291 by the coral host. Elevated nutritional value of mucus released from bleaching corals could have  
292 significant consequences for the reef’s nutrient cycle, while changes in both nutritional  
293 composition and antibacterial properties of the mucus should strongly affect coral-associated  
294 microbes and, as a consequence, coral disease susceptibility. Future experiments should  
295 investigate longer-term effects of thermal stress on mucus production and content to further  
296 investigate reef-wide consequences of coral bleaching.

297

298



299 **ACKNOWLEDGEMENTS**

300 We thank the Coral Reef Foundation for providing coral specimen and Sarah Davies for

301 measuring coral surface areas.

302

303 **FUNDING STATEMENT**

304 This work was funded by a 2016 PADI grant #21956 awarded to MES and a University of Texas

305 Co-op Undergraduate Research Fellowship awarded to HMG.

306

307

## 308 REFERENCES

- 309 Booth, D. J., and G. A. Beretta. 2002. "Changes in a Fish Assemblage after a Coral Bleaching  
310 Event." *Marine Ecology Progress Series* 245: 205–12.
- 311 Brown, B. E., and J. C. Bythell. 2005. "Perspectives on Mucus Secretion in Reef Corals."  
312 *Marine Ecology Progress Series* 296: 291–309.
- 313 Bruno, John F., Elizabeth R. Selig, Kenneth S. Casey, Cathie A. Page, Bette L. Willis, C. Drew  
314 Harvell, Hugh Sweatman, and Amy M. Melendy. 2007. "Thermal Stress and Coral Cover as  
315 Drivers of Coral Disease Outbreaks." *PLoS Biology* 5 (6): e124.
- 316 Bythell, John C., and Christian Wild. 2011. "Biology and Ecology of Coral Mucus Release."  
317 *Journal of Experimental Marine Biology and Ecology* 408 (1-2): 88–93.
- 318 Crossland, C. J. 1987. "In Situ Release of Mucus and DOC-Lipid from the Corals *Acropora*  
319 *Variabilis* and *Stylophora Pistillata* in Different Light Regimes." *Coral Reefs* 6 (1): 35–42.
- 320 Crossland, C. J., D. J. Barnes, and M. A. Borowitzka. 1980. "Diurnal Lipid and Mucus  
321 Production in the Staghorn Coral *Acropora Acuminata*." *Marine Biology* 60 (2-3): 81–90.
- 322 Davies, P. S. 1984. "The Role of Zooxanthellae in the Nutritional Energy Requirements of  
323 *Pocillopora Eydouxi*." *Coral Reefs* 2 (181). <https://doi.org/10.1007/BF00263571>.
- 324 Eakin, C. Mark, Jessica A. Morgan, Scott F. Heron, Tyler B. Smith, Gang Liu, Lorenzo Alvarez-  
325 Filip, Bart Baca, et al. 2010. "Caribbean Corals in Crisis: Record Thermal Stress,  
326 Bleaching, and Mortality in 2005." *PloS One* 5 (11): e13969.
- 327 Hadfield, Jarrod D. 2010. "MCMC Methods for Multi-Response Generalized Linear Mixed  
328 Models: TheMCMCglmmRPackage." *Journal of Statistical Software* 33 (2).  
329 <https://doi.org/10.18637/jss.v033.i02>.
- 330 Hughes, Terry P., James T. Kerry, Andrew H. Baird, Sean R. Connolly, Andreas Dietzel, C.  
331 Mark Eakin, Scott F. Heron, et al. 2018. "Global Warming Transforms Coral Reef  
332 Assemblages." *Nature* 556 (7702): 492–96.
- 333 Kenkel, C. D., E. Meyer, and M. V. Matz. 2013. "Gene Expression under Chronic Heat Stress in  
334 Populations of the Mustard Hill Coral (*Porites Astreoides*) from Different Thermal  
335 Environments." *Molecular Ecology* 22 (16): 4322–34.
- 336 Littman, Raechel A., David G. Bourne, and Bette L. Willis. 2010. "Responses of Coral-  
337 Associated Bacterial Communities to Heat Stress Differ with Symbiodinium Type on the  
338 Same Coral Host." *Molecular Ecology* 19 (9): 1978–90.
- 339 Manzello, Derek P. 2015. "Rapid Recent Warming of Coral Reefs in the Florida Keys."  
340 *Scientific Reports* 5 (November): 16762.
- 341 Matz, Mikhail V., Rachel M. Wright, and James G. Scott. 2013. "No Control Genes Required:  
342 Bayesian Analysis of qRT-PCR Data." *PloS One* 8 (8): e71448.
- 343 Maynard, Jeffrey, Ruben van Hooonk, C. Mark Eakin, Marjetta Puotinen, Melissa Garren,  
344 Gareth Williams, Scott F. Heron, et al. 2015. "Projections of Climate Conditions That  
345 Increase Coral Disease Susceptibility and Pathogen Abundance and Virulence." *Nature*  
346 *Climate Change* 5 (7): 688–94.
- 347 Nielsen, Daniel Aagren, Katherina Petrou, and Ruth D. Gates. 2018. "Coral Bleaching from a  
348 Single Cell Perspective." *The ISME Journal* 12 (6): 1558–67.
- 349 Nissimov, Jozef, Eugene Rosenberg, and Colin B. Munn. 2009. "Antimicrobial Properties of  
350 Resident Coral Mucus Bacteria of *Oculina Patagonica*." *FEMS Microbiology Letters* 292  
351 (2): 210–15.
- 352 Patton, J. S., and J. E. Burris. 1983. "Lipid Synthesis and Extrusion by Freshly Isolated

- 353 Zooxanthellae (symbiotic Algae)." *Marine Biology* 75 (2-3): 131–36.
- 354 Pfaffl, M. W. 2001. "A New Mathematical Model for Relative Quantification in Real-Time RT-  
355 PCR." *Nucleic Acids Research* 29 (9): 45e – 45.
- 356 Pinheiro, Jose, Douglas Bates, Saikat DebRoy, Deepayan Sarkar, and R Core Team. 2017. *Nlme*:  
357 *Linear and Nonlinear Mixed Effects Models*. <https://CRAN.R-project.org/package=nlme>.
- 358 Pinzon, J. H., B. Kamel, C. A. Burge, C. D. Harvell, M. Medina, E. Weil, and L. D. Mydlarz.  
359 2015. "Whole Transcriptome Analysis Reveals Changes in Expression of Immune-Related  
360 Genes during and after Bleaching in a Reef-Building Coral." *Royal Society Open Science* 2  
361 (4): 140214–140214.
- 362 Porter, James, Vladimir Kosmynin, Kathryn Patterson, Karen Porter, Walter Jaap, Jennifer  
363 Wheaton, Keith Hackett, et al. 2001. "Detection of Coral Reef Change by the Florida Keys  
364 Coral Reef Monitoring Project." In *The Everglades, Florida Bay, and Coral Reefs of the*  
365 *Florida Keys*.
- 366 R Core Team. 2017. *R: A Language and Environment for Statistical Computing* (version 3.4.0).  
367 <https://www.R-project.org>.
- 368 Richardson, Laura E., Nicholas A. J. Graham, Morgan S. Pratchett, Jacob G. Eurich, and Andrew  
369 S. Hoey. 2018. "Mass Coral Bleaching Causes Biotic Homogenization of Reef Fish  
370 Assemblages." *Global Change Biology* 24 (7): 3117–29.
- 371 Riegl, Bernhard, and George M. Branch. 1995. "Effects of Sediment on the Energy Budgets of  
372 Four Scleractinian (Bourne 1900) and Five Alcyonacean (Lamouroux 1816) Corals."  
373 *Journal of Experimental Marine Biology and Ecology* 186 (2): 259–75.
- 374 Ritchie, K. B. 2006. "Regulation of Microbial Populations by Coral Surface Mucus and Mucus-  
375 Associated Bacteria." *Marine Ecology Progress Series* 322: 1–14.
- 376 Rodrigues, Lisa J., and Andréa G. Grottoli. 2007. "Energy Reserves and Metabolism as  
377 Indicators of Coral Recovery from Bleaching." *Limnology and Oceanography* 52 (5): 1874–  
378 82.
- 379 Rouzé, Héloïse, Gaël Lecellier, Denis Saulnier, and Véronique Berteaux-Lecellier. 2016.  
380 "Symbiodinium Clades A and D Differentially Predispose *Acropora Cytherea* to Disease  
381 and *Vibrio* Spp. Colonization." *Ecology and Evolution* 6 (2): 560–72.
- 382 Schneider, Caroline A., Wayne S. Rasband, and Kevin W. Eliceiri. 2012. "NIH Image to ImageJ:  
383 25 Years of Image Analysis." *Nature Methods* 9 (7): 671–75.
- 384 Shnit-Orland, Maya, and Ariel Kushmaro. 2009. "Coral Mucus-Associated Bacteria: A Possible  
385 First Line of Defense." *FEMS Microbiology Ecology* 67 (3): 371–80.
- 386 Wild, Christian, Markus Huettel, Anke Klueter, Stephan G. Kremb, Mohammed Y. M. Rasheed,  
387 and Bo B. Jørgensen. 2004. "Coral Mucus Functions as an Energy Carrier and Particle Trap  
388 in the Reef Ecosystem." *Nature* 428 (6978): 66–70.
- 389 Williams, D. E., and M. W. Miller. 2011. "Attributing Mortality among Drivers of Population  
390 Decline in *Acropora Palmata* in the Florida Keys (USA)." *Coral Reefs* 31 (2): 369–82.
- 391 Williams, D. E., M. W. Miller, and K. L. Kramer. 2008. "Recruitment Failure in Florida Keys  
392 *Acropora Palmata*, a Threatened Caribbean Coral." *Coral Reefs* 27 (3): 697–705.
- 393 Winter, Rivah N. 2017. "Environmental Controls on the Reassembly of Symbiodinium  
394 Communities in Reef Corals Following Perturbation: Implications for Reef Futures under  
395 Climate Change." Thesis advisor: Andrew C. Baker. Doctor of Philosophy (PHD),  
396 University of Miami.
- 397 Winters, G., R. Holzman, A. Blekhman, S. Beer, and Y. Loya. 2009. "Photographic Assessment  
398 of Coral Chlorophyll Contents: Implications for Ecophysiological Studies and Coral

399 Monitoring.” *Journal of Experimental Marine Biology and Ecology* 380 (1-2): 25–35.  
400 Wright, Rachel M., Carly D. Kenkel, Carly E. Dunn, Erin N. Shilling, Line K. Bay, and Mikhail  
401 V. Matz. 2017. “Intraspecific Differences in Molecular Stress Responses and Coral  
402 Pathobiome Contribute to Mortality under Bacterial Challenge in *Acropora Millepora*.”  
403 *Scientific Reports* 7 (1): 2609.

404

405 **SUPPLEMENTAL FILES**

406

407 Data S1: Excel file containing experimental data.

408 Data S2: R script for analyzing data.
